# Supplementary material for: Unveiling the mechanisms of organic room-temperature phosphorescence in various surrounding environments: a computational study
Source: Royal Society of Chemistry journal article supplement (doi:10.1039/d1cp03010h), 2021-01-01
Supplement: d1cp03010h1.pdf [file d1cp03010h1.pdf]

## Electronic Supplementary Information

### Unveiling the mechanisms of organic room temperature phosphorescence in various surrounding environments: a computational study

Ancong Zhao<sup>1</sup>, Xiulan Wu<sup>1</sup>, Xin Jiang<sup>1</sup>, Jingran Gao<sup>1</sup>, Jian Wang<sup>2\*</sup>, Wei Shen<sup>1\*</sup>

<sup>1</sup> Key Laboratory of Luminescence Analysis and Molecular Sensing, Ministry of Education, School of Chemistry and Chemical Engineering, Southwest University, Chongqing 400715, P.R. China

<sup>2</sup> School of Elementary Education, Chongqing Normal University, Chongqing, 400715, P.R. China

### Content

|                                                                                                                                                                                              |   |
|----------------------------------------------------------------------------------------------------------------------------------------------------------------------------------------------|---|
| Computational details for NTO .....                                                                                                                                                          | 2 |
| Fig. S1 Molecular structures with the labeled atom index of complex b .....                                                                                                                  | 2 |
| Fig. S2 Calculated orbital energy levels, energy gaps and electron density contours of HOMOs and LUMOs for complex at $S_0$ equilibrium geometries in three cases. ....                      | 2 |
| Table. S1 Representative dihedral angles and bond angles are detailed in the table.....                                                                                                      | 3 |
| Table. S2 Selected dihedral angles and bond angles (in deg, marked in Fig. S <sub>1</sub> ) of $S_0$ , $S_1$ , and $T_1$ states in solution, crystal and amorphous phase, respectively. .... | 3 |
| Table. S3 Packing structure of complex b and excitonic coupling in crystal phase.....                                                                                                        | 4 |
| Table. S4 Packing structure of complex b and excitonic coupling in amorphous phase.....                                                                                                      | 4 |

---

\* Corresponding Author: wangjian@cqnu.edu.cn (Jian Wang), shenw@swu.edu.cn (Wei Shen)

## Computational details for NTO

To begin with, the central molecule is relaxed while the molecules of low level region are frozen during the QM/MM geometry optimizations with the  $\omega$ B97XD functional and 6-31G\*\* basis. Then, the molecules of low level region are replaced by background charges in NTO calculation with  $\text{iop}(9/40=4)$ .

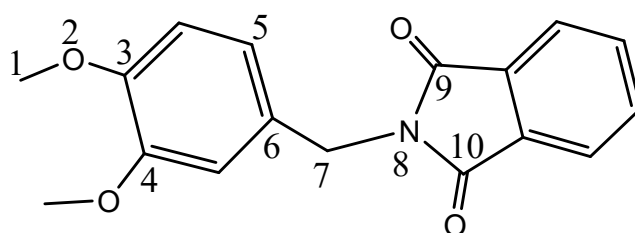

**Fig. S1** Molecular structures with the labeled atom index of complex b.

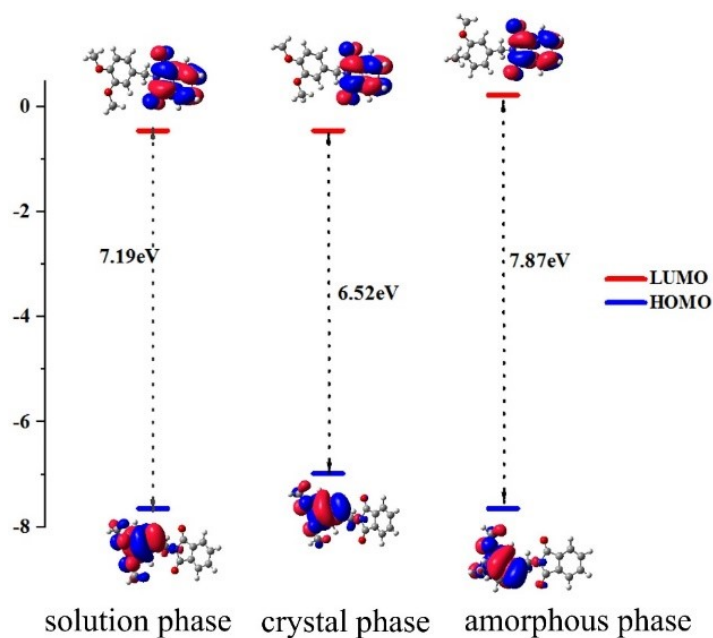

**Fig. S2** Calculated orbital energy levels, energy gaps and electron density contours of HOMOs and LUMOs for complex at  $S_0$  equilibrium geometries in three cases.

**Table. S1** Representative dihedral angles and bond angles are detailed in the table.

|            | <b>solution</b> | <b>crystal phase</b> | <b>amorphous phase</b> |
|------------|-----------------|----------------------|------------------------|
| $\theta_1$ | C5-C6-C7-N8     | C5-C6-C7-N8          | C5-C6-C7-N8            |
| $\theta_2$ | C1-O2-C3-C4     | C1-O2-C3-C4          | C1-O2-C3-C4            |
| $\theta_3$ | C6-C7-N8-C10    | C6-C7-N8-C10         | C6-C7-N8-C10           |
| $\alpha_1$ | C5-C6-C7        | C5-C6-C7             | C5-C6-C7               |
| $\alpha_2$ | C6-C7-C8        | C6-C7-C8             | C6-C7-C8               |
| $\alpha_3$ | C7-N8-C10       | C7-N8-C10            | C7-N8-C10              |

**Table. S2** Selected dihedral angles and bond angles (in deg, marked in Fig. S<sub>1</sub>) of S<sub>0</sub>, S<sub>1</sub>, and T<sub>1</sub> states in solution, crystal and amorphous phase, respectively.

|            | <b>solution phase</b> |                      |                      | <b>crystal phase</b> |                      |                      | <b>amorphous phase</b> |                      |                      |
|------------|-----------------------|----------------------|----------------------|----------------------|----------------------|----------------------|------------------------|----------------------|----------------------|
|            | <b>S<sub>0</sub></b>  | <b>S<sub>1</sub></b> | <b>T<sub>1</sub></b> | <b>S<sub>0</sub></b> | <b>S<sub>1</sub></b> | <b>T<sub>1</sub></b> | <b>S<sub>0</sub></b>   | <b>S<sub>1</sub></b> | <b>T<sub>1</sub></b> |
| $\theta_1$ | 101.1                 | 73.1                 | 66.7                 | 106.9                | 109.1                | 107.3                | 95.7                   | 94.0                 | 95.6                 |
| $\theta_2$ | 179.8                 | 179.5                | 179.8                | 174.3                | 177.5                | 177.8                | 173.6                  | 176.0                | 174.1                |
| $\theta_3$ | 90.1                  | 73.6                 | 84.1                 | 103.3                | 103.3                | 107.5                | 79.9                   | 81.0                 | 79.4                 |
| $\alpha_1$ | 121.1                 | 118.1                | 117.8                | 120.6                | 120.6                | 120.7                | 119.7                  | 119.0                | 119.6                |
| $\alpha_2$ | 112.4                 | 101.0                | 109.4                | 113.0                | 109.1                | 108.1                | 115.2                  | 112.3                | 115.2                |
| $\alpha_3$ | 124.1                 | 122.2                | 122.8                | 124.4                | 123.4                | 123.9                | 123.6                  | 122.8                | 122.4                |

Table. S3 Packing structure of complex b and excitonic coupling in crystal phase.

| Dimer | J      | Dimer | J      |
|-------|--------|-------|--------|
| V1    | -0.215 | V5    | 0.006  |
| V2    | -0.206 | V6    | 0.016  |
| V3    | 0.084  | V7    | -0.023 |
| V4    | -0.006 | V8    | 0.083  |

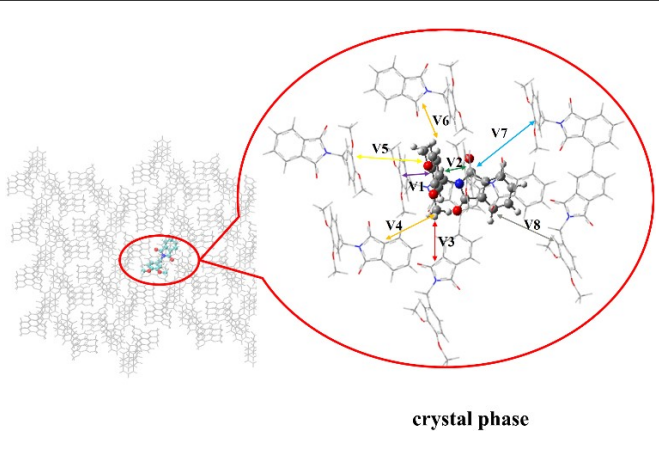

**crystal phase**

Table. S4 Packing structure of complex b and excitonic coupling in amorphous phase.

| Dimer | J      | Dimer | J      | Dimer | J      |
|-------|--------|-------|--------|-------|--------|
| V1    | -0.196 | V6    | 0.031  | V11   | -0.056 |
| V2    | -0.006 | V7    | -0.010 | V12   | 0.092  |
| V3    | 0.443  | V8    | -0.001 | V13   | 0.011  |
| V4    | 0.035  | V9    | 0.026  | V14   | -0.033 |
| V5    | 0.003  | V10   | -0.051 |       |        |

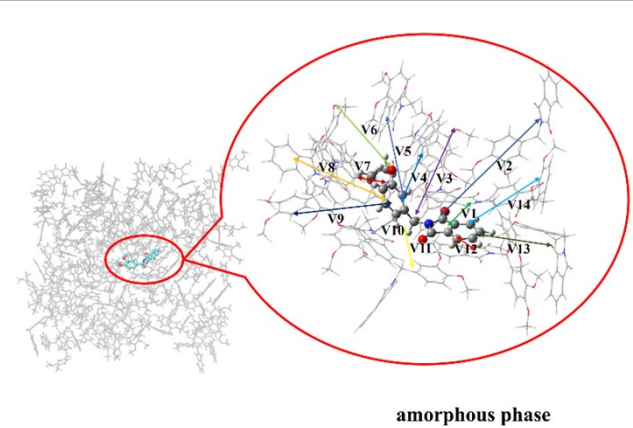

**amorphous phase**
